# Supplementary material
Source: PubMed Central journal article supplement (PMC6647763)
Supplement: ao8b03293_si_001.pdf [file ao8b03293_si_001.pdf]

## SUPPORTING INFORMATION

### **PET imaging of gastrin-releasing peptide receptor with a novel bombesin analogue**

Joseph Lau,<sup>†,‡</sup> Etienne Rousseau,<sup>†,‡,§</sup> Zhengxing Zhang,<sup>‡</sup> Carlos F. Uribe,<sup>‡</sup> Hsiou-Ting Kuo,<sup>‡</sup> Jutta Zeisler,<sup>‡</sup> Chengcheng Zhang,<sup>‡</sup> Daniel Kwon,<sup>‡</sup> Kuo-Shyan Lin,<sup>\*,‡,||</sup> François Bénard<sup>\*,‡,||</sup>

<sup>†</sup>Contributed equally to this work.

<sup>‡</sup>Department of Molecular Oncology, BC Cancer Research Centre, 675 West 10<sup>th</sup> Avenue, V5Z 1L3, Vancouver, BC, Canada

<sup>§</sup>Département de Médecine Nucléaire et Radiobiologie, Université de Sherbrooke, 3001 12<sup>e</sup> Avenue Nord, J1H 5N4, Sherbrooke, QC, Canada

<sup>||</sup>Department of Radiology, University of British Columbia, 2211 Wesbrook Mall, V6T 1Z7, Vancouver, BC, Canada

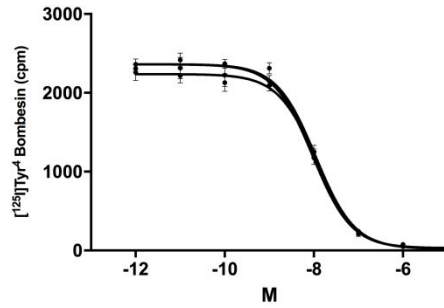

|               | Ki         |
|---------------|------------|
| H3042 - set 1 | 1.155e-008 |
| H3042 - set 2 | 1.096e-008 |
| H3042 - set 3 | 9.489e-009 |

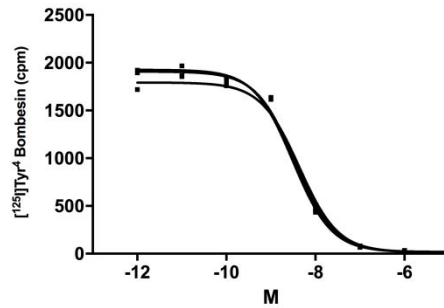

|                     | Ki         |
|---------------------|------------|
| Ga-ProBOMB1 - set 1 | 4.361e-009 |
| Ga-ProBOMB1 - set 2 | 3.468e-009 |
| Ga-ProBOMB1 - set 3 | 3.094e-009 |

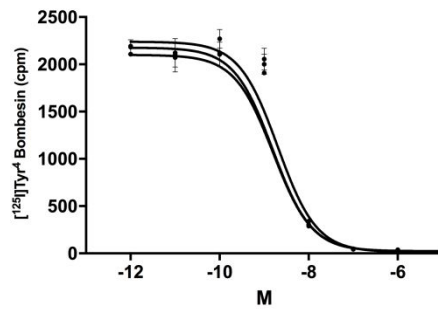

|                     | Ki         |
|---------------------|------------|
| Ga-NeoBOMB1 - set 1 | 1.551e-009 |
| Ga-NeoBOMB1 - set 2 | 2.024e-009 |
| Ga-NeoBOMB1 - set 3 | 1.59e-009  |

**Supplemental Figure 1.** Representative displacement curves of [<sup>125</sup>I-Tyr<sup>4</sup>]Bombesin by [D-Phe<sup>6</sup>,Leu-NHET<sup>13</sup>,des-Met<sup>14</sup>]Bombesin(6-14) (H3042, top), Ga-ProBOMB1 (middle), and Ga-NeoBOMB1 (bottom).

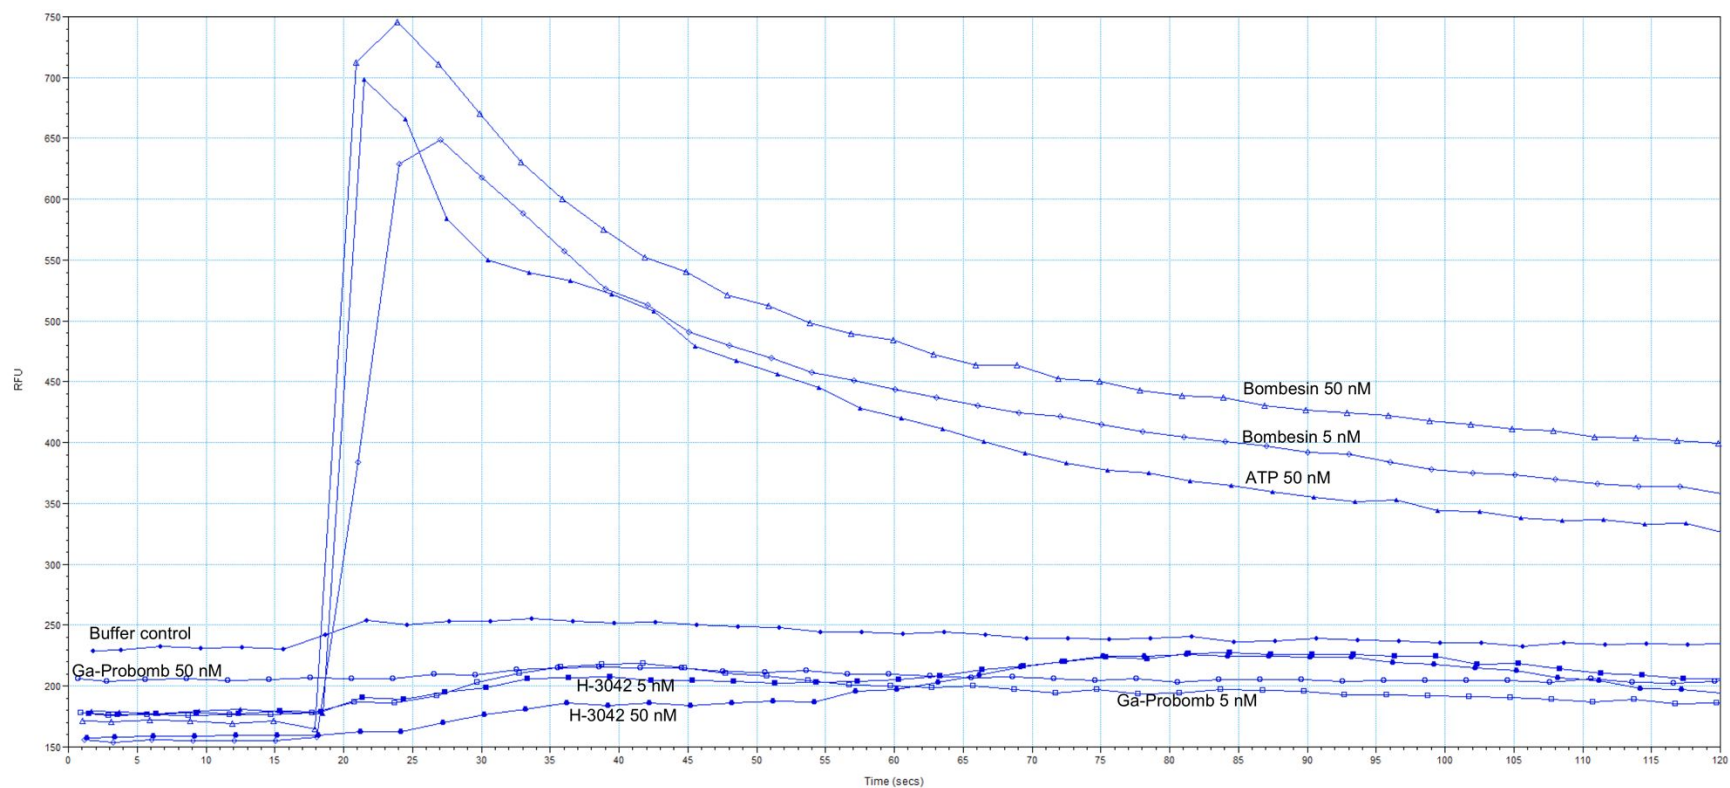

**Supplemental Figure 2.** FLIPR Calcium 6 release assay in PC-3 cells. Cells were incubated with Ga-ProBOMB1, H-3042 ([D-Phe<sup>6</sup>,Leu-NHET<sup>13</sup>,des-Met<sup>14</sup>]Bombesin(6-14)], Bombesin, ATP, or PBS control. The y-axis is relative fluorescence unit (RFU) and the x-axis is time (sec).

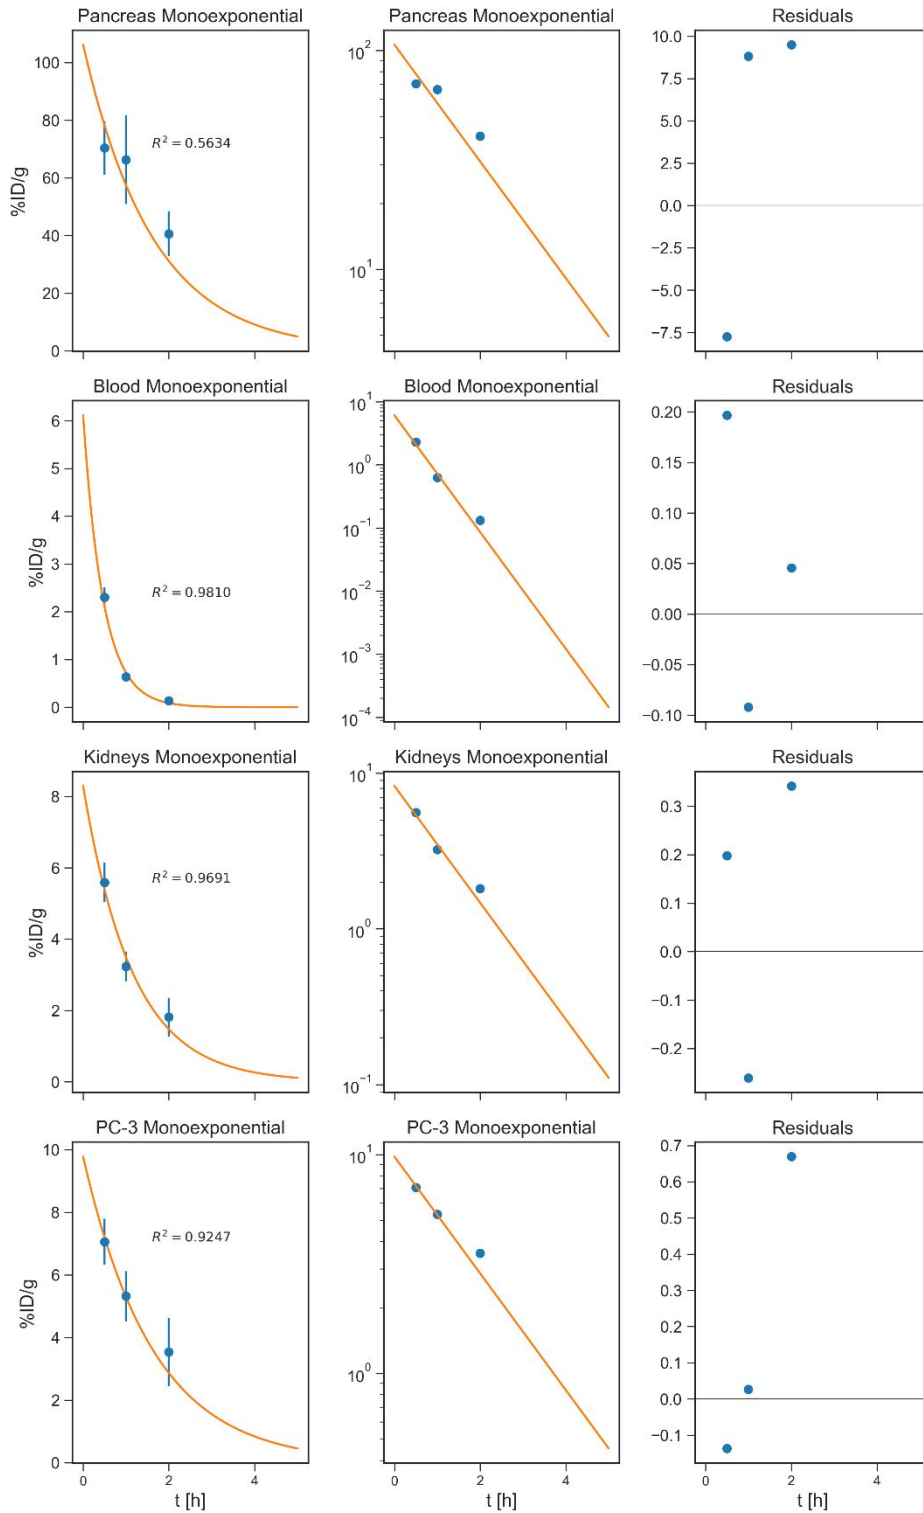

**Supplemental Figure 3.** Uptake of the  $[^{68}\text{Ga}]\text{Ga-NeoBOMB1}$  as a function of time for pancreas, blood, kidneys and PC-3 tumors. The total number of decays per unit injected dose is calculated by multiplying the area under the curve by the phantom organ mass. The y-axis is percentage injected dose per gram of tissue (%ID/g) and the x-axis is time (h).

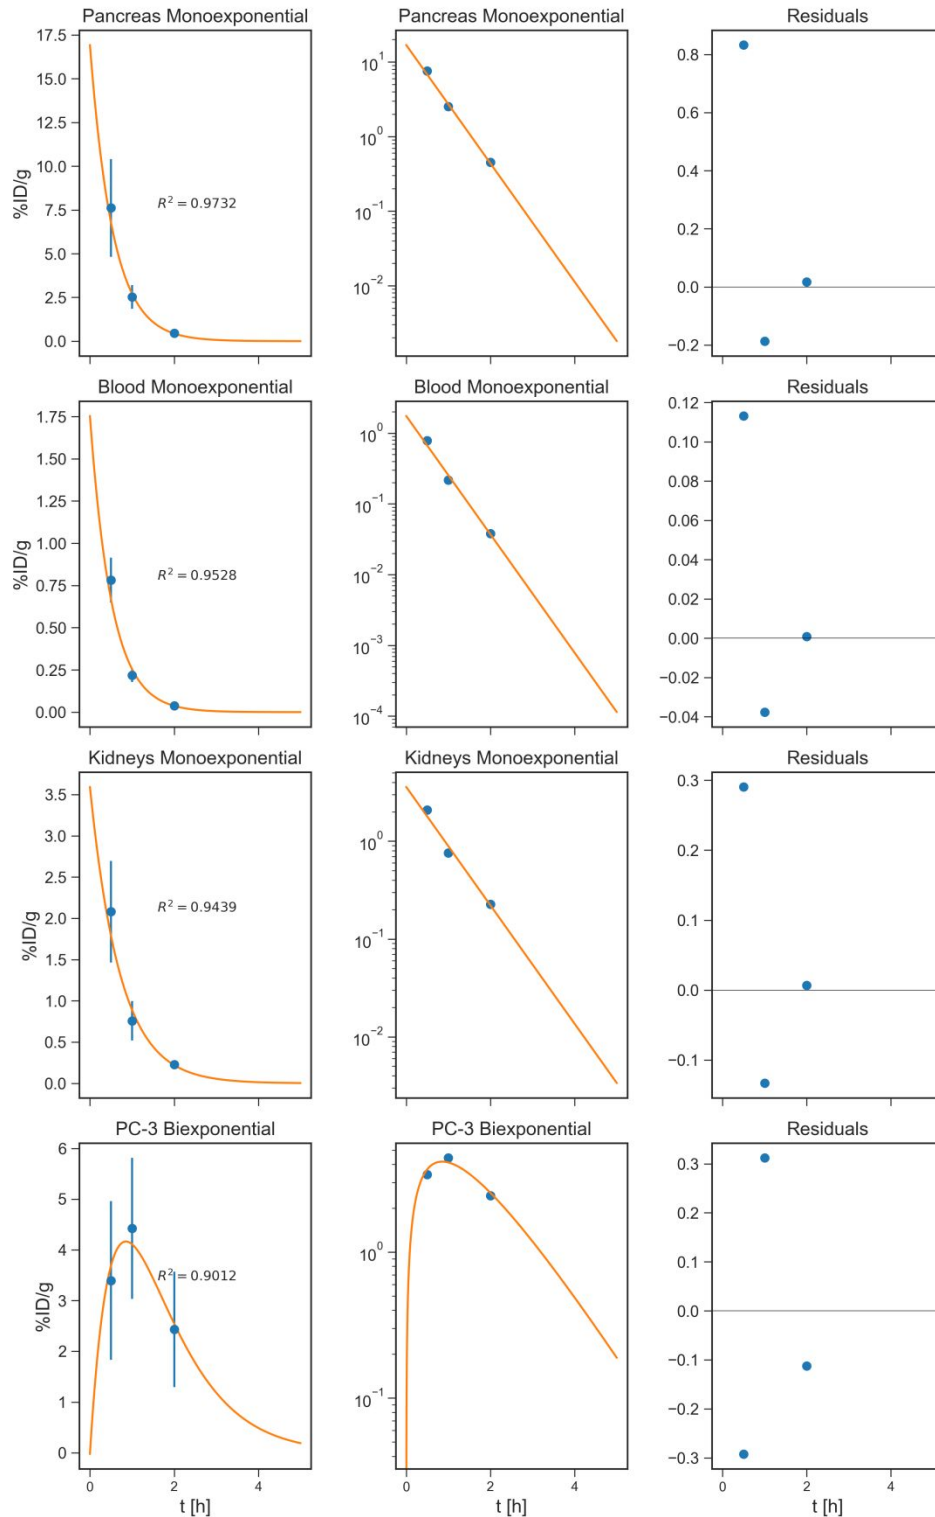

**Supplemental Figure 4.** Uptake of the  $[^{68}\text{Ga}]\text{Ga-ProBOMB1}$  as a function of time for pancreas, blood, kidneys and PC-3 tumors. The total number of decays per unit injected dose is calculated by multiplying the area under the curve by the phantom organ mass. The y-axis is percentage injected dose per gram of tissue (%ID/g) and the x-axis is time (h).

**Supplemental Table 1.** Biodistribution and tumor-to-organ contrasts of [<sup>68</sup>Ga]Ga-NeoBOMB1 in PC-3 xenograft bearing mice at selected time-points.

| Tissues           | 30 min |       |   | 60 min |       |   | 120 min |       |   |
|-------------------|--------|-------|---|--------|-------|---|---------|-------|---|
|                   | Mean   | SD    | n | Mean   | SD    | n | Mean    | SD    | n |
| Blood             | 3.13   | 0.28  | 5 | 1.17   | 0.12  | 5 | 0.45    | 0.10  | 8 |
| Fat               | 0.20   | 0.03  | 5 | 0.17   | 0.04  | 5 | 0.17    | 0.02  | 8 |
| Seminal glands    | 0.19   | 0.05  | 4 | 0.56   | 0.71  | 4 | 0.25    | 0.12  | 7 |
| Testes            | 0.50   | 0.08  | 5 | 0.29   | 0.07  | 4 | 0.19    | 0.04  | 8 |
| Intestine         | 10.61  | 0.86  | 5 | 11.26  | 2.52  | 5 | 10.99   | 1.66  | 8 |
| Stomach           | 2.62   | 1.27  | 5 | 2.82   | 1.51  | 5 | 3.46    | 1.49  | 8 |
| Spleen            | 3.64   | 3.96  | 5 | 3.35   | 2.89  | 5 | 2.52    | 3.30  | 7 |
| Liver             | 10.16  | 1.61  | 5 | 5.14   | 1.28  | 5 | 2.76    | 0.17  | 7 |
| Pancreas          | 95.73  | 12.67 | 5 | 122.54 | 28.40 | 5 | 138.70  | 26.75 | 8 |
| Adrenals          | 15.24  | 12.35 | 5 | 16.11  | 8.28  | 5 | 19.03   | 7.78  | 8 |
| Kidney            | 7.59   | 0.76  | 5 | 5.98   | 0.78  | 5 | 6.21    | 1.85  | 8 |
| Lung              | 6.29   | 2.32  | 5 | 7.93   | 4.30  | 5 | 3.31    | 5.07  | 8 |
| Heart             | 0.69   | 0.12  | 5 | 0.47   | 0.05  | 5 | 0.34    | 0.02  | 8 |
| Muscle            | 0.45   | 0.11  | 5 | 0.27   | 0.09  | 5 | 0.40    | 0.13  | 7 |
| Bone              | 0.67   | 0.23  | 5 | 1.01   | 0.43  | 5 | 1.13    | 0.21  | 8 |
| Brain             | 0.07   | 0.01  | 5 | 0.07   | 0.03  | 5 | 0.08    | 0.03  | 8 |
| PC-3 Tumor        | 9.60   | 0.99  | 5 | 9.83   | 1.48  | 5 | 12.07   | 3.72  | 8 |
| <b>Ratios</b>     |        |       |   |        |       |   |         |       |   |
| Tumor-to-Blood    | 3.08   | 0.35  | 5 | 8.38   | 0.78  | 5 | 28.42   | 11.30 | 8 |
| Tumor-to-Muscle   | 22.33  | 6.04  | 5 | 39.00  | 12.55 | 5 | 30.54   | 8.38  | 7 |
| Tumor-to-Kidney   | 1.27   | 0.15  | 5 | 1.66   | 0.26  | 5 | 1.99    | 0.52  | 8 |
| Tumor-to-Pancreas | 0.10   | 0.01  | 5 | 0.08   | 0.03  | 5 | 0.09    | 0.02  | 8 |
| Tumor-to-Liver    | 0.96   | 0.20  | 5 | 2.00   | 0.55  | 5 | 4.33    | 1.57  | 7 |

**Supplemental Table 2.** Biodistribution and tumor-to-organ contrasts of [<sup>68</sup>Ga]Ga-ProBOMB1 in PC-3 xenograft bearing mice at selected time-points.

| Tissues           | 30 min |       |   | 60 min |       |   | 120 min |        |   | 60 min blocked |       |   |
|-------------------|--------|-------|---|--------|-------|---|---------|--------|---|----------------|-------|---|
|                   | Mean   | SD    | n | Mean   | SD    | n | Mean    | SD     | n | Mean           | SD    | n |
| Blood             | 1.06   | 0.18  | 6 | 0.40   | 0.07  | 8 | 0.13    | 0.01   | 6 | 0.33           | 0.24  | 7 |
| Fat               | 0.17   | 0.05  | 6 | 0.06   | 0.02  | 8 | 0.07    | 0.05   | 7 | 0.04           | 0.02  | 7 |
| Seminal glands    | 0.17   | 0.05  | 6 | 1.08   | 1.82  | 8 | 0.43    | 0.74   | 6 | 0.47           | 0.72  | 7 |
| Testes            | 0.31   | 0.06  | 6 | 0.11   | 0.04  | 8 | 0.09    | 0.03   | 7 | 0.07           | 0.03  | 7 |
| Intestine         | 2.63   | 0.77  | 6 | 2.47   | 0.51  | 8 | 1.68    | 0.81   | 7 | 1.63           | 0.86  | 7 |
| Stomach           | 0.53   | 0.17  | 6 | 0.41   | 0.18  | 8 | 0.18    | 0.06   | 7 | 0.10           | 0.04  | 7 |
| Spleen            | 0.50   | 0.21  | 6 | 0.44   | 0.24  | 8 | 0.31    | 0.15   | 7 | 0.20           | 0.06  | 7 |
| Liver             | 1.93   | 0.76  | 6 | 1.21   | 0.45  | 8 | 0.75    | 0.37   | 7 | 1.23           | 0.78  | 7 |
| Pancreas          | 10.35  | 3.79  | 6 | 4.68   | 1.26  | 8 | 1.55    | 0.49   | 7 | 2.12           | 1.05  | 7 |
| Adrenals          | 0.95   | 0.25  | 5 | 0.65   | 0.34  | 8 | 1.23    | 1.33   | 7 | 0.47           | 0.24  | 7 |
| Kidney            | 2.83   | 0.84  | 6 | 1.40   | 0.44  | 8 | 0.78    | 0.16   | 7 | 1.22           | 0.43  | 7 |
| Lung              | 0.54   | 0.09  | 6 | 0.35   | 0.12  | 7 | 0.25    | 0.09   | 6 | 0.19           | 0.02  | 6 |
| Heart             | 0.27   | 0.04  | 6 | 0.14   | 0.05  | 8 | 0.11    | 0.06   | 7 | 0.08           | 0.01  | 6 |
| Muscle            | 0.36   | 0.39  | 6 | 0.09   | 0.03  | 8 | 0.08    | 0.04   | 6 | 0.15           | 0.15  | 7 |
| Bone              | 0.22   | 0.18  | 6 | 0.26   | 0.11  | 8 | 0.39    | 0.35   | 7 | 0.13           | 0.04  | 7 |
| Brain             | 0.02   | 0.00  | 6 | 0.02   | 0.01  | 8 | 0.03    | 0.02   | 7 | 0.01           | 0.00  | 7 |
| PC-3 Tumor        | 4.62   | 2.13  | 6 | 8.17   | 2.57  | 8 | 8.31    | 3.88   | 7 | 3.12           | 1.68  | 7 |
| <b>Ratios</b>     |        |       |   |        |       |   |         |        |   |                |       |   |
| Tumor-to-Blood    | 4.43   | 2.13  | 6 | 20.63  | 6.79  | 8 | 66.57   | 40.07  | 6 | 11.93          | 7.25  | 7 |
| Tumor-to-Muscle   | 26.08  | 25.00 | 6 | 105.66 | 57.74 | 8 | 159.62  | 169.58 | 6 | 36.76          | 29.11 | 7 |
| Tumor-to-Kidney   | 1.82   | 1.09  | 6 | 6.25   | 2.33  | 8 | 11.20   | 6.72   | 7 | 2.51           | 0.75  | 7 |
| Tumor-to-Pancreas | 0.47   | 0.24  | 6 | 1.80   | 0.55  | 8 | 5.97    | 3.11   | 7 | 1.56           | 0.52  | 7 |
| Tumor-to-Liver    | 2.91   | 2.21  | 6 | 7.33   | 2.97  | 8 | 13.26   | 5.72   | 7 | 2.69           | 0.67  | 7 |

\*Mice received a co-injection of 100 µg of [D-Phe<sup>6</sup>,Leu-NHEt<sup>13</sup>,des-Met<sup>14</sup>]Bombesin(6-14).

**Supplemental Table 3.** Absorbed doses for different organs in mice calculated with OLINDA software.

| <b>Target Organ</b> | <b>[<sup>68</sup>Ga]Ga-NeoBOMB1<br/>Absorbed Dose [mGy/MBq]</b> | <b>[<sup>68</sup>Ga]Ga-ProBOMB1<br/>Absorbed Dose [mGy/MBq]</b> |
|---------------------|-----------------------------------------------------------------|-----------------------------------------------------------------|
| Brain               | 0.258                                                           | 0.0678                                                          |
| Large intestine     | 3.240                                                           | 0.7750                                                          |
| Small intestine     | 3.150                                                           | 0.6960                                                          |
| Stomach wall        | 3.080                                                           | 0.3700                                                          |
| Heart               | 1.060                                                           | 0.2090                                                          |
| Kidneys             | 3.290                                                           | 0.5150                                                          |
| Liver               | 2.480                                                           | 0.3970                                                          |
| Lungs               | 1.060                                                           | 0.1940                                                          |
| Pancreas            | 8.000                                                           | 0.7250                                                          |
| Skeleton            | 2.790                                                           | 0.9170                                                          |
| Spleen              | 3.030                                                           | 0.3440                                                          |
| Testes              | 1.050                                                           | 0.7950                                                          |
| Thyroid             | 0.455                                                           | 0.1170                                                          |
| Urinary bladder     | 9.330                                                           | 10.0000                                                         |
| Remainder of body   | 1.360                                                           | 0.3720                                                          |
